# Supplementary material for: Green Extraction of Antioxidant Flavonoids from Pigeon Pea (Cajanus cajan (L.) Millsp.) Seeds and Its Antioxidant Potentials Using Ultrasound-Assisted Methodology
Source: MDPI journal article supplement (doi:10.3390/molecules26247557), 2021-12-13
Supplement: s1 [file s1]

# Green Extraction of Antioxidant Flavonoids from Pigeon Pea (*Cajanus cajan* (L.) Millsp) Seeds and Its Antioxidant Potentials using Ultrasound-Assisted Methodology

Duangjai Tungmunthum <sup>1,2,3,\*</sup>, Samantha Drouet <sup>2</sup>, Jose Manuel Lorenzo <sup>4,5</sup> and Christophe Hano <sup>2,3,\*</sup>

<sup>1</sup> Department of Pharmaceutical Botany, Faculty of Pharmacy, Mahidol University, Bangkok 10400, Thailand; duangjai.tun@mahidol.ac.th (D.T.)

<sup>2</sup> Laboratoire de Biologie des Ligneux et des Grandes Cultures, INRAE USC1328, Campus Eure et Loir, Orleans University, 28000 Chartres, France; duangjai.tun@mahidol.ac.th (D.T.) ; samantha.drouet@univ-orleans.fr (S.D.) ; hano@univ-orleans.fr ([C.H.](#))

<sup>3</sup> Le Studium Institute for Advanced Studies, 1 Rue Dupanloup, 45000 Orléans, France; duangjai.tun@mahidol.ac.th (D.T.) ; hano@univ-orleans.fr ([C.H.](#))

<sup>4</sup> Centro Tecnológico de la Carne de Galicia, Adva. Galicia n° 4, Parque Tecnológico de Galicia, San Cibrao das Viñas, 32900 Ourense, Spain; jmlorenzo@ceteca.net (J.M.L.)

<sup>6</sup> Área de Tecnología de los Alimentos, Facultad de Ciencias de Ourense, Universidad de Vigo, 32004 Ourense, Spain

\* Correspondence: duangjai.tun@mahidol.ac.th (D.T.); hano@univ-orleans.fr ([C.H.](#))

## Content:

**Table S1.** TFC and *in vitro* cell-free antioxidant activity values in the 41 BBD observations.

**Figure S1.** Basic structure of A. flavonoid and B. isoflavonoid.

**Figure S2.** Yeast cells survival rate under UV stress.

**Figure S3.** Workflow of the optimized USAE of (iso)flavonoids from pigeon pea seeds.

**Table S1.** TFC and *in vitro* cell-free antioxidant activity values in the 41 BBD observations.

|       | TFC       |      | ABTS              |      | DPPH              |       | CUPRAC            |       | FRAP              |      |
|-------|-----------|------|-------------------|------|-------------------|-------|-------------------|-------|-------------------|------|
|       | (mg/g DM) |      | (μmol TEAC/mg DM) |      | (μmol TEAC/mg DM) |       | (μmol TEAC/mg DM) |       | (μmol TEAC/mg DM) |      |
|       | Mean      | SD   | Mean              | SD   | Mean              | SD    | Mean              | SD    | Mean              | SD   |
| Obs1  | 23.94     | 1.35 | 169.83            | 3.13 | 160.04            | 1.25  | 30.69             | 0.95  | 31.83             | 1.90 |
| Obs2  | 26.05     | 2.68 | 161.94            | 2.16 | 156.42            | 0.72  | 53.98             | 3.65  | 55.64             | 1.44 |
| Obs3  | 30.46     | 1.71 | 176.47            | 1.44 | 216.54            | 3.74  | 70.38             | 1.44  | 90.59             | 1.44 |
| Obs4  | 30.66     | 0.37 | 178.13            | 3.30 | 247.74            | 1.25  | 70.38             | 6.50  | 91.42             | 1.90 |
| Obs5  | 25.60     | 1.62 | 119.59            | 4.99 | 152.35            | 4.37  | 48.79             | 2.59  | 51.07             | 1.25 |
| Obs6  | 24.76     | 2.31 | 108.37            | 1.21 | 150.09            | 1.44  | 38.17             | 3.81  | 43.18             | 0.72 |
| Obs7  | 29.56     | 0.03 | 173.98            | 1.90 | 188.06            | 0.72  | 67.68             | 1.25  | 68.93             | 1.90 |
| Obs8  | 29.76     | 0.67 | 174.81            | 4.00 | 190.32            | 0.72  | 67.89             | 0.72  | 79.76             | 2.16 |
| Obs9  | 34.24     | 0.12 | 200.14            | 1.90 | 294.75            | 2.16  | 95.99             | 1.65  | 116.82            | 0.72 |
| Obs10 | 32.27     | 0.94 | 194.74            | 1.38 | 287.52            | 1.25  | 82.95             | 3.07  | 104.33            | 1.90 |
| Obs11 | 36.04     | 0.50 | 203.46            | 5.62 | 303.34            | 0.72  | 110.76            | 0.72  | 121.65            | 4.72 |
| Obs12 | 32.08     | 1.32 | 187.68            | 7.18 | 284.36            | 2.88  | 84.95             | 1.30  | 103.50            | 1.25 |
| Obs13 | 33.33     | 0.25 | 195.99            | 1.44 | 288.42            | 3.30  | 89.16             | 3.75  | 105.16            | 0.72 |
| Obs14 | 31.44     | 1.46 | 180.62            | 1.25 | 258.59            | 3.81  | 75.67             | 2.52  | 72.25             | 1.25 |
| Obs15 | 31.70     | 0.36 | 181.04            | 1.44 | 262.20            | 4.00  | 73.91             | 1.54  | 102.67            | 7.30 |
| Obs16 | 29.81     | 1.57 | 174.81            | 7.08 | 207.50            | 1.25  | 68.10             | 3.89  | 69.76             | 2.49 |
| Obs17 | 24.39     | 2.42 | 82.22             | 8.98 | 106.77            | 2.88  | 33.39             | 2.36  | 35.35             | 0.42 |
| Obs18 | 27.04     | 1.10 | 165.68            | 4.49 | 156.87            | 2.88  | 59.89             | 4.24  | 63.95             | 1.44 |
| Obs19 | 25.69     | 2.24 | 144.08            | 1.50 | 152.80            | 3.81  | 50.24             | 2.00  | 54.39             | 2.59 |
| Obs20 | 37.64     | 0.92 | 230.04            | 0.72 | 329.20            | 0.72  | 133.88            | 6.66  | 138.55            | 7.30 |
| Obs21 | 29.46     | 3.63 | 172.74            | 4.00 | 173.15            | 0.72  | 66.64             | 3.81  | 63.51             | 0.60 |
| Obs22 | 37.07     | 0.85 | 224.22            | 1.88 | 316.45            | 0.72  | 121.18            | 2.00  | 144.31            | 0.72 |
| Obs23 | 26.59     | 1.87 | 164.02            | 4.72 | 156.42            | 3.30  | 54.39             | 2.19  | 60.62             | 1.44 |
| Obs24 | 45.26     | 2.61 | 282.43            | 3.35 | 429.92            | 2.97  | 218.62            | 1.04  | 275.37            | 1.45 |
| Obs25 | 31.20     | 2.70 | 178.96            | 2.59 | 252.26            | 1.90  | 72.67             | 2.16  | 97.83             | 3.60 |
| Obs26 | 33.90     | 2.81 | 197.65            | 5.62 | 288.88            | 0.72  | 92.57             | 10.28 | 115.57            | 1.44 |
| Obs27 | 27.07     | 0.48 | 165.68            | 3.30 | 158.68            | 1.90  | 63.74             | 3.81  | 65.61             | 1.44 |
| Obs28 | 38.26     | 0.60 | 230.87            | 0.72 | 340.87            | 1.25  | 149.56            | 4.21  | 159.45            | 3.74 |
| Obs29 | 30.11     | 2.53 | 175.64            | 2.49 | 216.09            | 1.25  | 69.55             | 2.81  | 85.17             | 1.44 |
| Obs30 | 31.94     | 2.44 | 182.29            | 3.60 | 270.34            | 1.44  | 74.33             | 3.65  | 93.08             | 1.90 |
| Obs31 | 27.75     | 1.70 | 166.92            | 3.30 | 165.91            | 1.25  | 65.40             | 7.58  | 67.68             | 1.90 |
| Obs32 | 38.34     | 1.61 | 231.70            | 1.25 | 346.74            | 75.58 | 169.76            | 4.72  | 168.17            | 5.03 |
| Obs33 | 27.70     | 1.68 | 166.51            | 1.44 | 164.56            | 0.72  | 64.15             | 0.95  | 77.68             | 1.90 |
| Obs34 | 36.62     | 0.05 | 204.29            | 1.25 | 304.70            | 0.72  | 118.13            | 1.30  | 138.48            | 6.59 |
| Obs35 | 27.90     | 1.53 | 167.34            | 1.90 | 172.24            | 0.72  | 68.23             | 1.65  | 65.10             | 1.90 |
| Obs36 | 34.67     | 0.20 | 200.97            | 2.59 | 295.21            | 9.73  | 96.61             | 9.67  | 117.23            | 1.25 |
| Obs37 | 45.01     | 5.53 | 264.37            | 5.19 | 423.60            | 2.66  | 213.85            | 2.29  | 260.77            | 2.81 |
| Obs38 | 45.98     | 3.32 | 292.32            | 3.60 | 448.46            | 3.72  | 223.34            | 2.83  | 303.95            | 5.53 |
| Obs39 | 43.75     | 3.28 | 234.19            | 1.25 | 412.75            | 2.74  | 201.87            | 1.45  | 226.58            | 2.34 |
| Obs40 | 40.73     | 1.07 | 233.36            | 1.44 | 346.92            | 1.68  | 159.10            | 3.62  | 201.74            | 1.89 |
| Obs41 | 41.80     | 1.15 | 233.36            | 1.90 | 351.72            | 7.88  | 178.20            | 1.62  | 226.30            | 3.79 |

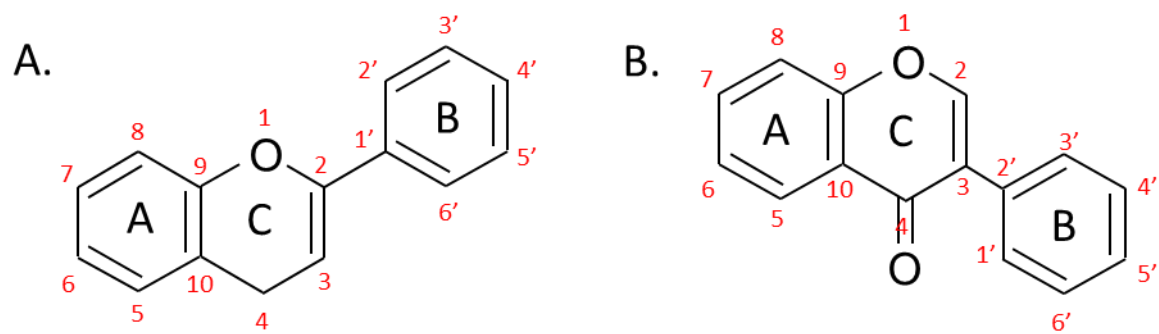

**Figure S1.** Basic structure of A. flavonoid and B. isoflavonoid.

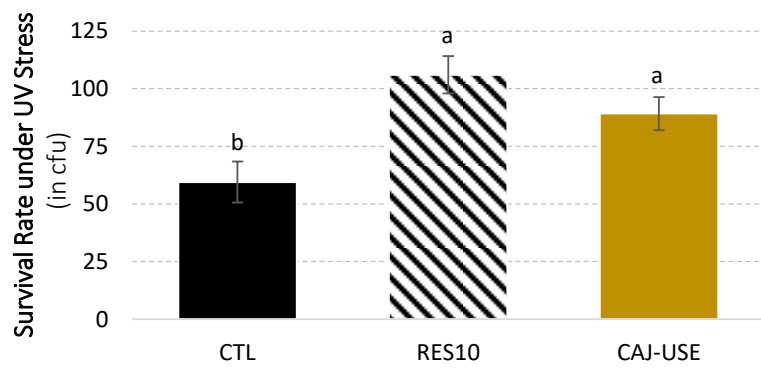

**Figure S2.** Yeast cells survival rate under UV stress.

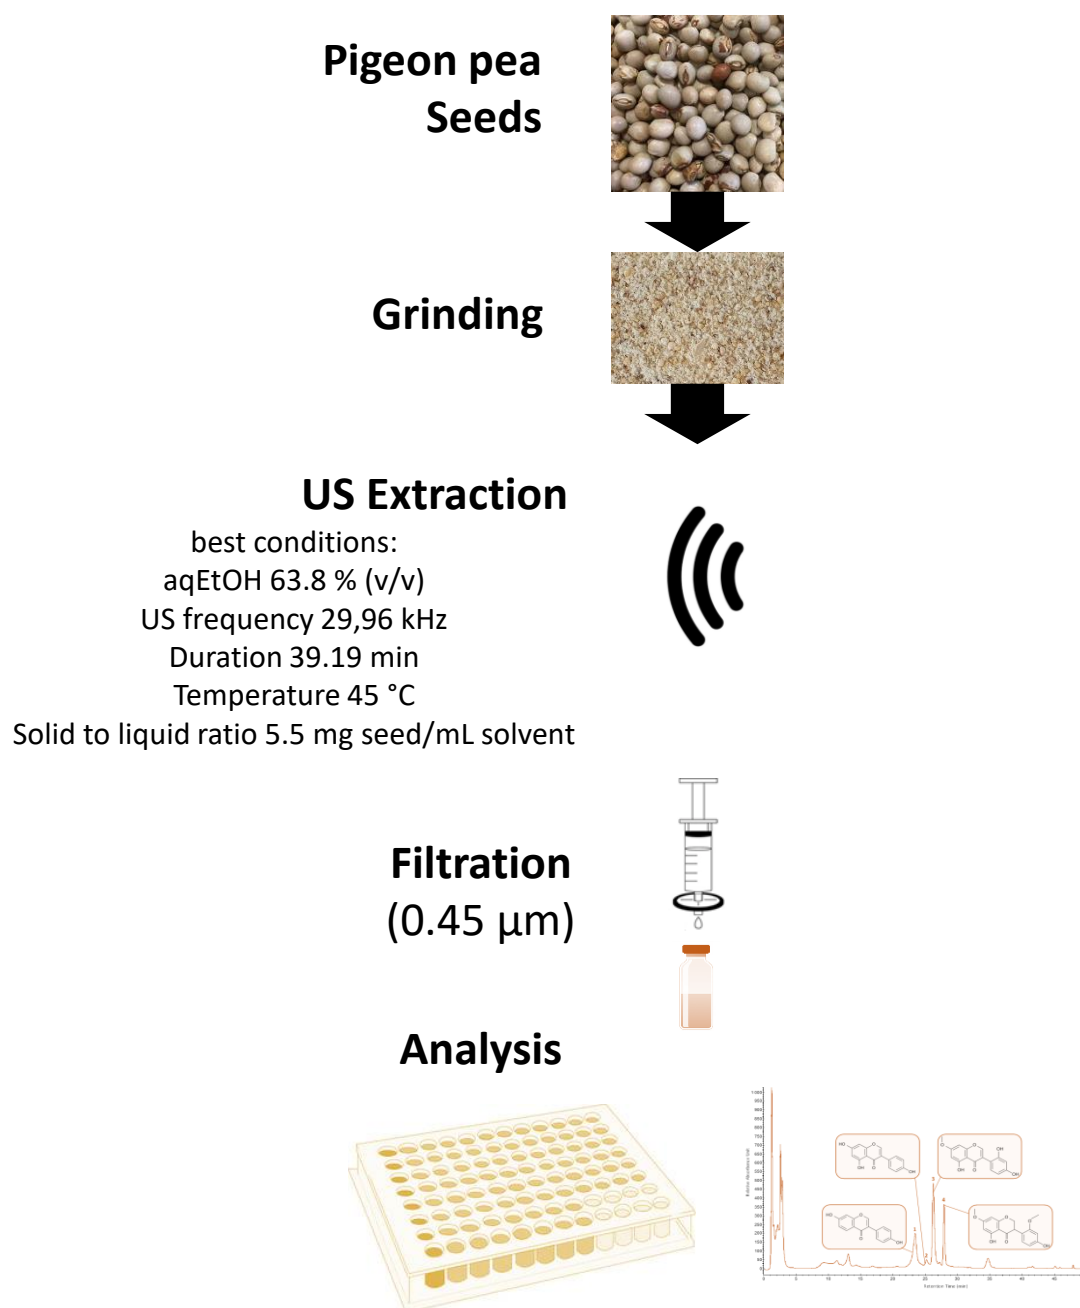

**Figure S3.** Workflow of the optimized USAE of (iso)flavonoids from pigeon pea seeds.
